# Supplementary material for: Modelling earthquake rates and associated uncertainties in the Marmara Region, Turkey
Source: Copernicus journal article supplement (doi:10.5194/nhess-21-2733-2021), 2021-08-30
Supplement: Supplementary file [file nhess-21-2733-2021-supplement-title-page.pdf › nhess-21-2733-2021-supplement-title-page.pdf]

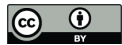

## *Supplement of*

# **Modelling earthquake rates and associated uncertainties in the Marmara Region, Turkey**

**Thomas Chartier et al.**

*Correspondence to:* Thomas Chartier ([thomas.chartier@globalquakemodel.org](mailto:thomas.chartier@globalquakemodel.org))

- nhess-21-2733-2021-supplement-title-page.pdf
- supplements
  - .DS\_Store
  - SHERIFS
    - \* .DS\_Store
    - \* 1\_SHERIFS\_V1\_1.py
    - \* 2\_Visualisation.py
    - \* LT\_hypotheses\_names.txt
    - \* User\_Manual\_SHERIFS\_V1.1.pdf
    - \* data
    - \* lib
    - \* model\_Marmara
  - Scoring.xlsx

The copyright of individual parts of the supplement might differ from the article licence.
